# Supplementary material for: Spatiotemporal patterns of N 2 fixation in coastal waters derived from rate measurements and remote sensing
Source: Copernicus journal article supplement (doi:10.5194/bg-2020-419), 2020-11-13
Supplement: Supplementary file 1 [file bg-2020-419-supplement.pdf]

# Spatiotemporal patterns of N<sub>2</sub> fixation in coastal waters derived from rate measurements and remote sensing

5

Mindaugas Zilius<sup>1\*</sup>, Irma Vybernaite-Lubiene<sup>1</sup>, Diana Vaiciute<sup>1</sup>, Donata Overlingė<sup>1</sup>, Evelina Griniene<sup>1</sup>,  
Anastasija Zaiko<sup>2,3</sup>, Stefano Bonaglia<sup>1,4</sup>, Iris Liskow<sup>5</sup>, Maren Voss<sup>5</sup>, Agneta Andersson<sup>6</sup>, Sonia Brugel<sup>6</sup>,  
10 Tobia Politi<sup>1</sup>, and Paul A. Bukaveckas<sup>7\*</sup>

<sup>1</sup>Marine Research Institute, Klaipeda University, Klaipeda, 92294, Lithuania

<sup>2</sup>Coastal and Freshwater Group, Cawthron Institute, Nelson, 7042, New Zealand

15 <sup>3</sup>Zealand Institute of Marine Science, University of Auckland, Auckland, Private Bag 92019, New Zealand

<sup>4</sup>Department of Marine Sciences, University of Gothenburg, Box 461, Gothenburg, 40530, Sweden

<sup>5</sup>Department of Biological Oceanography, Leibniz Institute for Baltic Sea Research, Rostock, 18119, Germany

<sup>6</sup>Department of Ecology and Environmental Sciences, Umeå University, Umeå, 90187, Sweden

<sup>7</sup>Center for Environmental Studies, Virginia Commonwealth University, Richmond, VA 23284, USA

20

25

30

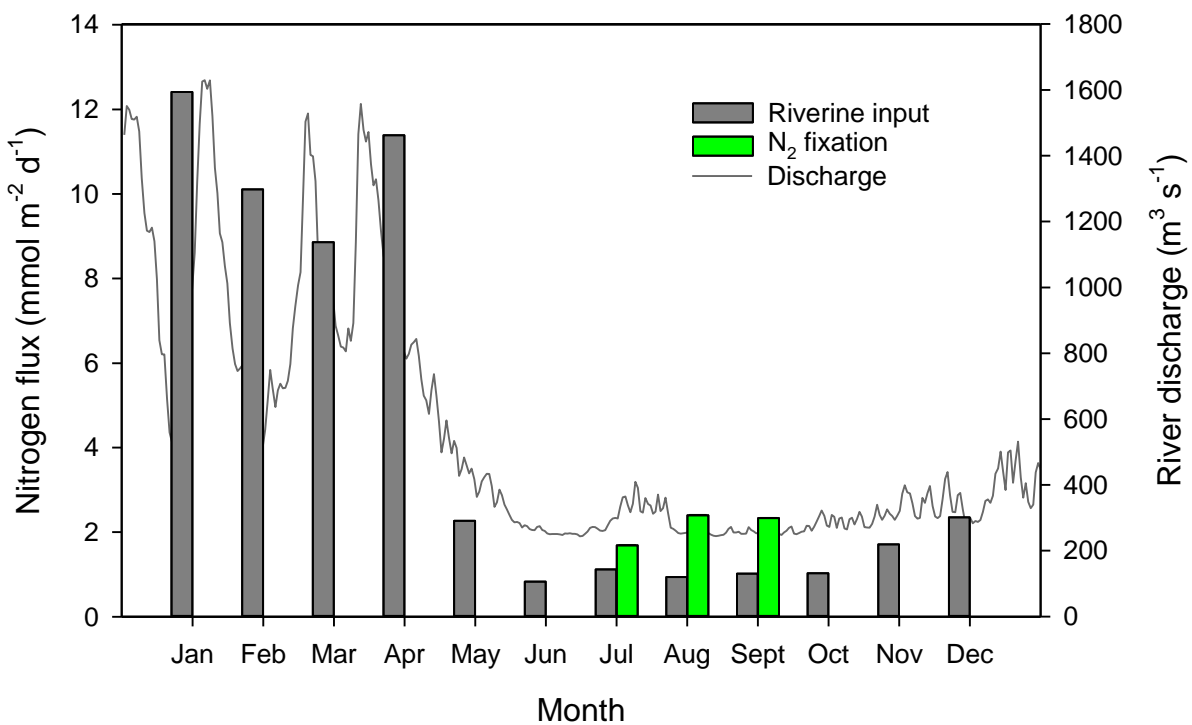

40 **Figure S1:** Nitrogen fluxes associated with riverine input to the Curonian Lagoon (total nitrogen, grey bars) and N<sub>2</sub> fixation in water column based on remote sensing of Chlorophyll-a (green bars), and daily Nemunas River discharge (grey line) in 2018. N<sub>2</sub> fixation rates are mean and standard error (some error bars not visible). The Lithuanian Hydro-Meteorological Service provides discharge data at the gauging section.
